# Supplementary material
Source: PubMed Central journal article supplement (PMC2695996)
Supplement: NIHMS104842-supplement-supplement_1.pdf [file NIHMS104842-supplement-supplement_1.pdf]

1  
2  
3 for 21 days. LPS/OVA (●); rWNVE alone (◆); LPS/rWNVE s.c. (■); LPS/rWNVE oral (▲);  
4 and LPS/rWNVE nasal (▼). Results are combined data from two experiments (n=10).  
5  
6  
7

8 **Supplementary Figure.**  
9

10  
11 Splenocyte stimulation after vaccination with West Nile virus envelope protein. Mice (n=5)  
12 were subcutaneously injected at the base of the tail with 10 µg rWNVE encapsulated in LPS-  
13 modified or unmodified particles, or absorbed to Alhydrogel. Unloaded particles were  
14 administered as a control. At 5 weeks post-vaccination, splenocytes were isolated and stimulated  
15 with 12.5 µg/ml rWNVE. After 48 h, supernatant was analyzed for IFN-γ by ELISA.  
16  
17  
18  
19  
20  
21  
22  
23  
24  
25  
26  
27  
28  
29  
30  
31  
32  
33  
34  
35  
36  
37  
38  
39  
40  
41  
42  
43  
44  
45  
46  
47  
48  
49  
50  
51  
52  
53  
54  
55  
56  
57  
58  
59  
60  
61  
62  
63  
64  
65

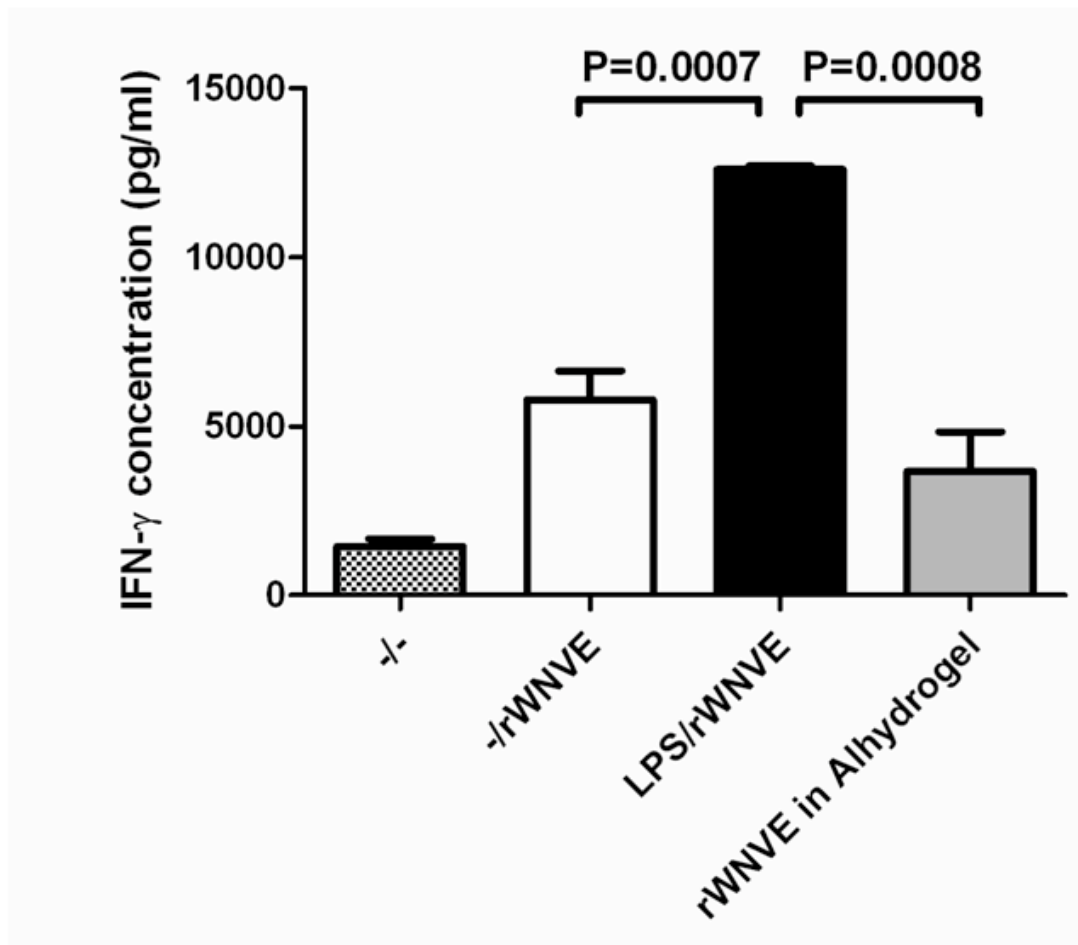

Suppl. Figure A
